# Supplementary material for: Solution structure of DNA containing α-OH-PdG: the mutagenic adduct produced by acrolein
Source: PubMed Central journal article supplement — Nucleic Acids Res. 2009 Feb 17;37(7):2153–63. doi: 10.1093/nar/gkp076 (PMC2673425; doi:10.1093/nar/gkp076), 2009-02-17
Supplement: gkp076_1.pdf [file gkp076_1.pdf]

Table 1S: Proton chemical shifts of the  $\alpha(\text{OH})\text{PdG}\cdot\text{dC}$  duplex recorded at 25°C

|                                                                                                    | H6/H8        | H1'          | H3'          | H4'          | H2''         | H2'          | H2/Me/H5     | T(N3H)/G(N1H) <sup>a</sup> | C(N4H) <sub>hb</sub> /C(N4H) <sup>a</sup> <sub>nhb</sub> |
|----------------------------------------------------------------------------------------------------|--------------|--------------|--------------|--------------|--------------|--------------|--------------|----------------------------|----------------------------------------------------------|
| C1                                                                                                 | 7.61         | 5.75         | 4.67         | 4.04         | 2.41         | 2.00         | 5.88         |                            |                                                          |
| G2                                                                                                 | 7.95         | 5.95         | 4.95         | 4.34         | 2.76         | 2.66         |              | 12.76                      |                                                          |
| T3(R)<br>T3(S)                                                                                     | 7.21         | 5.68<br>4.69 | 4.84         | 4.15         | 2.40         | 2.05         | 1.48         | 13.43                      |                                                          |
| A4(R)<br>A4(S)                                                                                     | 8.23<br>8.21 | 6.08         | 4.98<br>4.97 | 4.37         | 2.77<br>2.75 | 2.62<br>2.61 |              |                            |                                                          |
| C5(R)<br>C5(S)                                                                                     | 7.09<br>7.05 | 5.71         | 4.67<br>4.63 | 4.17<br>4.15 | 2.42<br>2.46 | 1.67<br>1.65 | 5.11<br>5.16 |                            | 7.91/6.70<br>7.91/6.83                                   |
| $\alpha(\text{OH})\text{PdG(R)}$ <sup>b,c</sup><br>$\alpha(\text{OH})\text{PdG(S)}$ <sup>b,c</sup> | 7.28<br>7.23 | 5.73<br>5.75 | 4.78         |              | 2.46<br>2.47 | 2.19<br>2.18 |              |                            | 8.42<br>8.53                                             |
| C7(R)<br>C7(S)                                                                                     | 7.57<br>7.59 | 4.91<br>4.93 | 4.79<br>4.80 |              | 2.33         | 2.33         | 5.67<br>5.62 |                            | 8.11/6.44<br>7.96/6.54                                   |
| A8(R)<br>A8(S)                                                                                     | 8.26<br>8.25 | 6.21         | 4.98         | 4.35         | 2.90         | 2.67         | 7.63         |                            |                                                          |
| T9                                                                                                 | 7.05         | 5.70         | 4.81         | 4.08         | 2.30         | 1.90         | 1.42         | 13.56                      |                                                          |
| G10                                                                                                | 7.82         | 5.88         | 4.93         | 4.32         | 2.65         | 2.56         |              | 12.70                      |                                                          |
| C11                                                                                                | 7.41         | 6.14         | 4.45         | 4.03         | 2.15         | 2.15         | 5.39         |                            | 8.13/6.58                                                |
| G12                                                                                                | 7.92         | 5.95         | 4.80         | 4.20         | 2.75         | 2.59         |              | 12.92                      |                                                          |
| C13                                                                                                | 7.46         | 5.65         | 4.86         | 4.19         | 2.46         | 2.14         | 5.40         |                            | 8.37/6.53                                                |
| A14                                                                                                | 8.32         | 6.25         | 5.02         | 4.41         | 2.92         | 2.69         | 7.67         |                            |                                                          |
| T15(R)<br>T15(S)                                                                                   | 7.04<br>7.05 | 5.64<br>5.62 | 4.81         | 4.08         | 2.25<br>2.26 | 1.84<br>1.86 | 1.41<br>1.42 | 13.32/13.30 <sup>d</sup>   |                                                          |
| G16(R)<br>G16(S)                                                                                   | 7.86<br>7.89 | 5.80<br>5.86 | 4.94<br>4.95 | 4.34<br>4.36 | 2.64<br>2.71 | 2.64<br>2.65 |              | 12.46/12.37 <sup>d</sup>   |                                                          |
| C17(R)<br>C17(S)                                                                                   | 7.45<br>7.41 | 5.74<br>5.70 | 4.78         | 4.10<br>4.07 | 2.30<br>2.28 | 1.61         | 5.66<br>5.57 |                            | 9.78/8.77<br>9.78/8.82                                   |
| G18(R)<br>G18(S)                                                                                   | 8.02<br>8.00 | 5.92<br>5.90 | 4.96<br>4.95 | 4.32<br>4.31 | 2.79<br>2.76 | 2.69<br>2.68 |              | 12.76<br>12.63             |                                                          |
| T19(R)<br>T19(S)                                                                                   | 7.19<br>7.20 | 5.66         | 4.83         |              | 2.39         | 2.04         | 1.44<br>1.46 | 13.43<br>13.48             |                                                          |
| A20(R)<br>A20(S)                                                                                   | 8.25         | 6.17         | 4.98         | 4.37         | 2.82         | 2.66         | 7.41<br>7.40 |                            |                                                          |
| C21                                                                                                | 7.24         | 5.62         | 4.74         | 4.10         | 2.24         | 1.82         | 5.32         |                            |                                                          |
| G22                                                                                                | 7.85         | 6.10         | 4.62         | 4.12         | 2.32         | 2.54         |              |                            |                                                          |

Chemical shifts referenced TSP. <sup>a</sup>Determined at 5°C. <sup>b</sup>H2'/H2'' were not specifically assigned. <sup>c</sup>The chemical shift of exocyclic protons is H $\alpha$ : 5.26 and 5.18 ppm; H $\beta\beta'$ : 2.15/1.74 and 2.10/1.82 ppm; H $\gamma\gamma'$ : 4.04/3.38 and 4.30/3.15 ppm. <sup>d</sup>Enantiomer specific signals not assigned.

| Table 2S. Empirical Structural Restraints |             |
|-------------------------------------------|-------------|
| G•C Watson-Crick HB Distances (Å)         |             |
| G(H1)-C(N3)                               | 1.940 ±0.10 |
| G(O6)-C(H4)                               | 1.900 ±0.10 |
| G(H2)-C(O2)                               | 1.840 ±0.10 |
| A•T Watson-Crick HB Distances (Å)         |             |
| T(H3)-A(N1)                               | 1.810 ±0.10 |
| T(O4)-A(N6)                               | 1.840 ±0.10 |
| Backbone Dihedral Angles (°)              |             |
| $\alpha$ (O3'-P-O5'-C5')                  | 290 ±18     |
| $\beta$ (P-O5'-C5'-C4')                   | 182 ±20     |
| $\gamma$ (O5'-C5'-C4'-C3')                | 52 ±11      |
| $\delta$ (C5'-C4'-C3'-O3')                | 103 ±24     |
| $\epsilon$ (C4'-C3'-O3'-P)                | 188 ±9      |
| $\zeta$ (C3'-O3'-P-O5')                   | 288 ±30     |

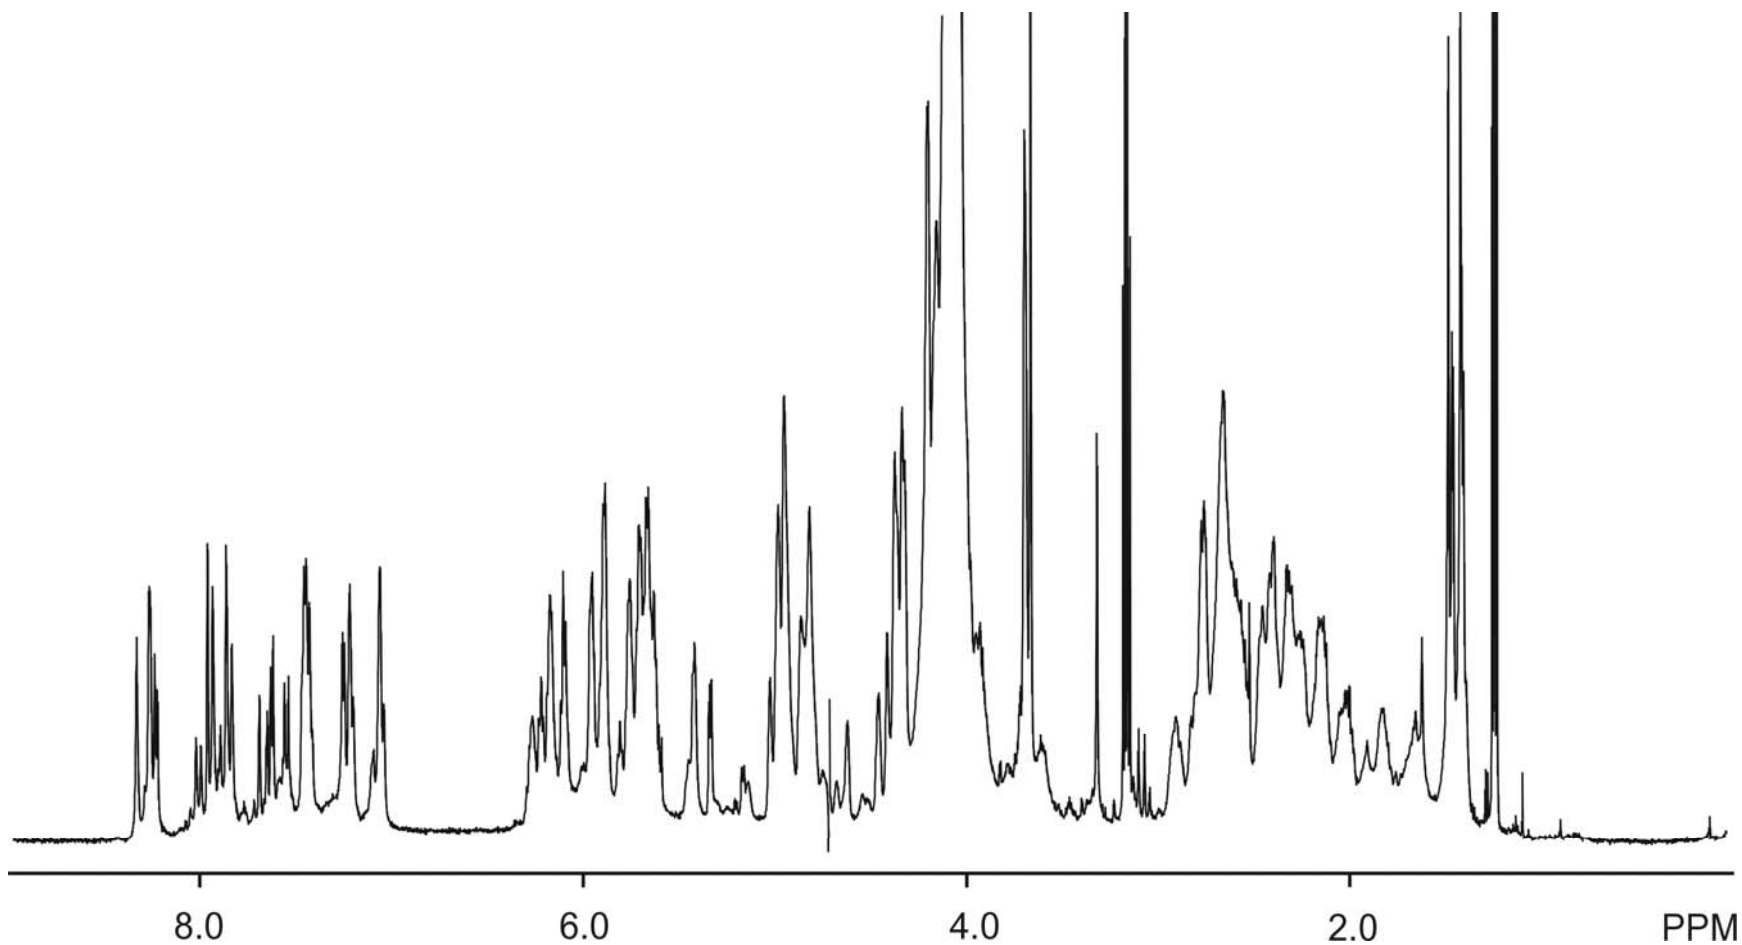

Figure 1S: 500 MHz proton spectrum of the  $\alpha$ -(OH)-PdG•dC duplex recorded at 25°C with the sample dissolved in 100% D<sub>2</sub>O buffer (25 mM phosphate containing 50 mM NaCl and 1 mM EDTA), pH 5.9.

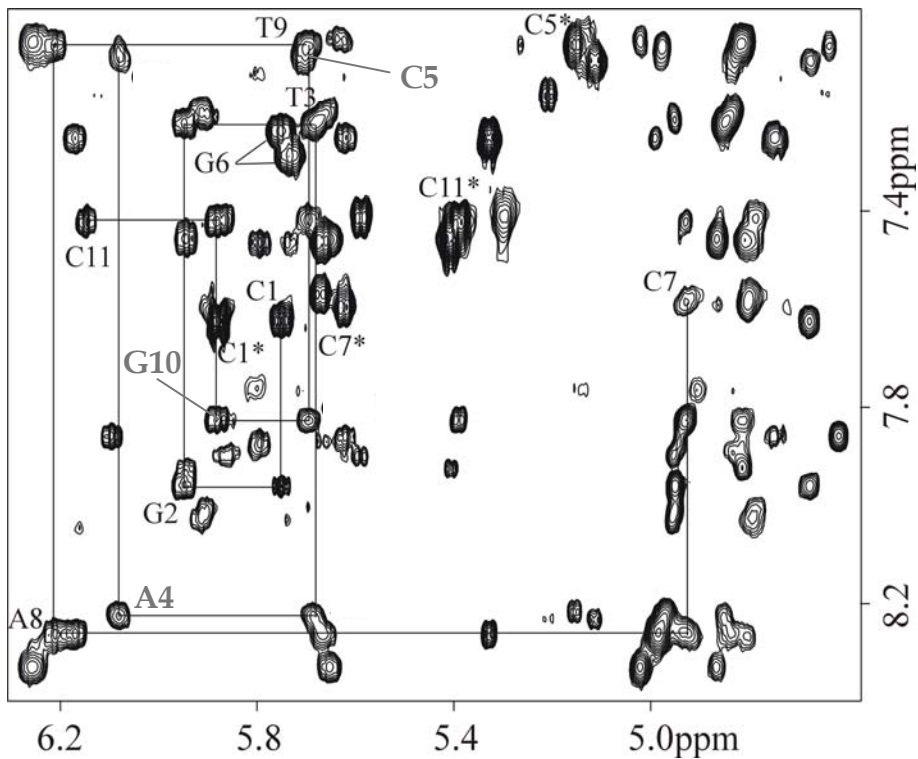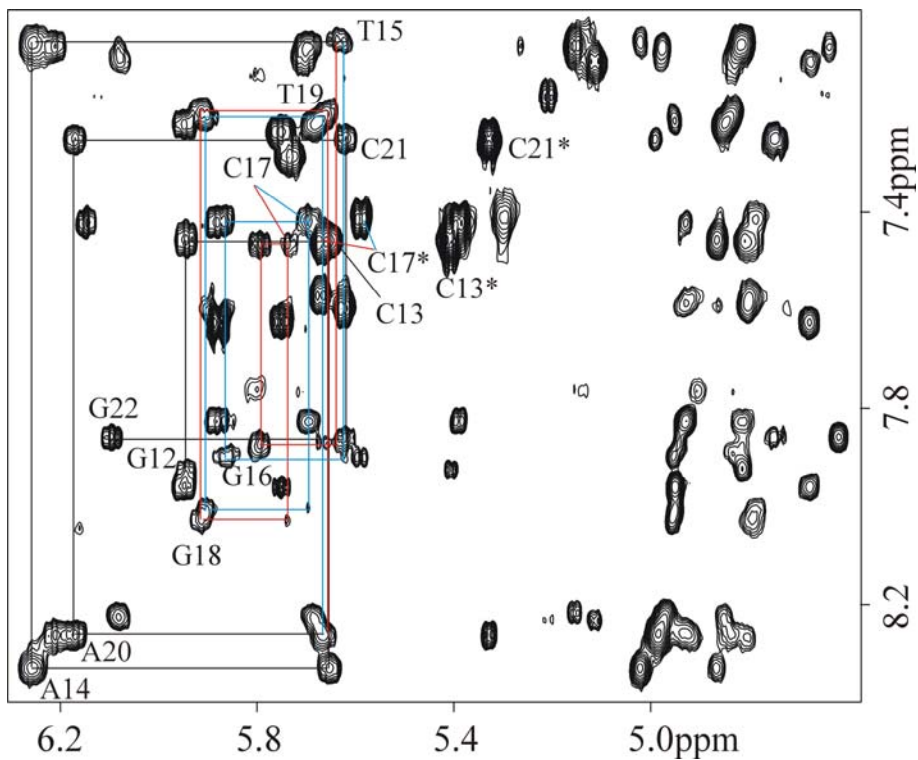

Figure 2S: Finger print region of a 500 MHz NOESY (300 ms mixing time) spectrum recorded with the sample dissolved in 100% D<sub>2</sub>O buffer, pH 5.9, at 25°C. The figure shows the NOESY 'walk' on the  $\alpha$ -OH-PdG•dC duplex, from C1 to C5 and C7 to C11 in the lesion-containing strand (top panel) and from G12 to G22 in the unmodified strand (bottom panel).

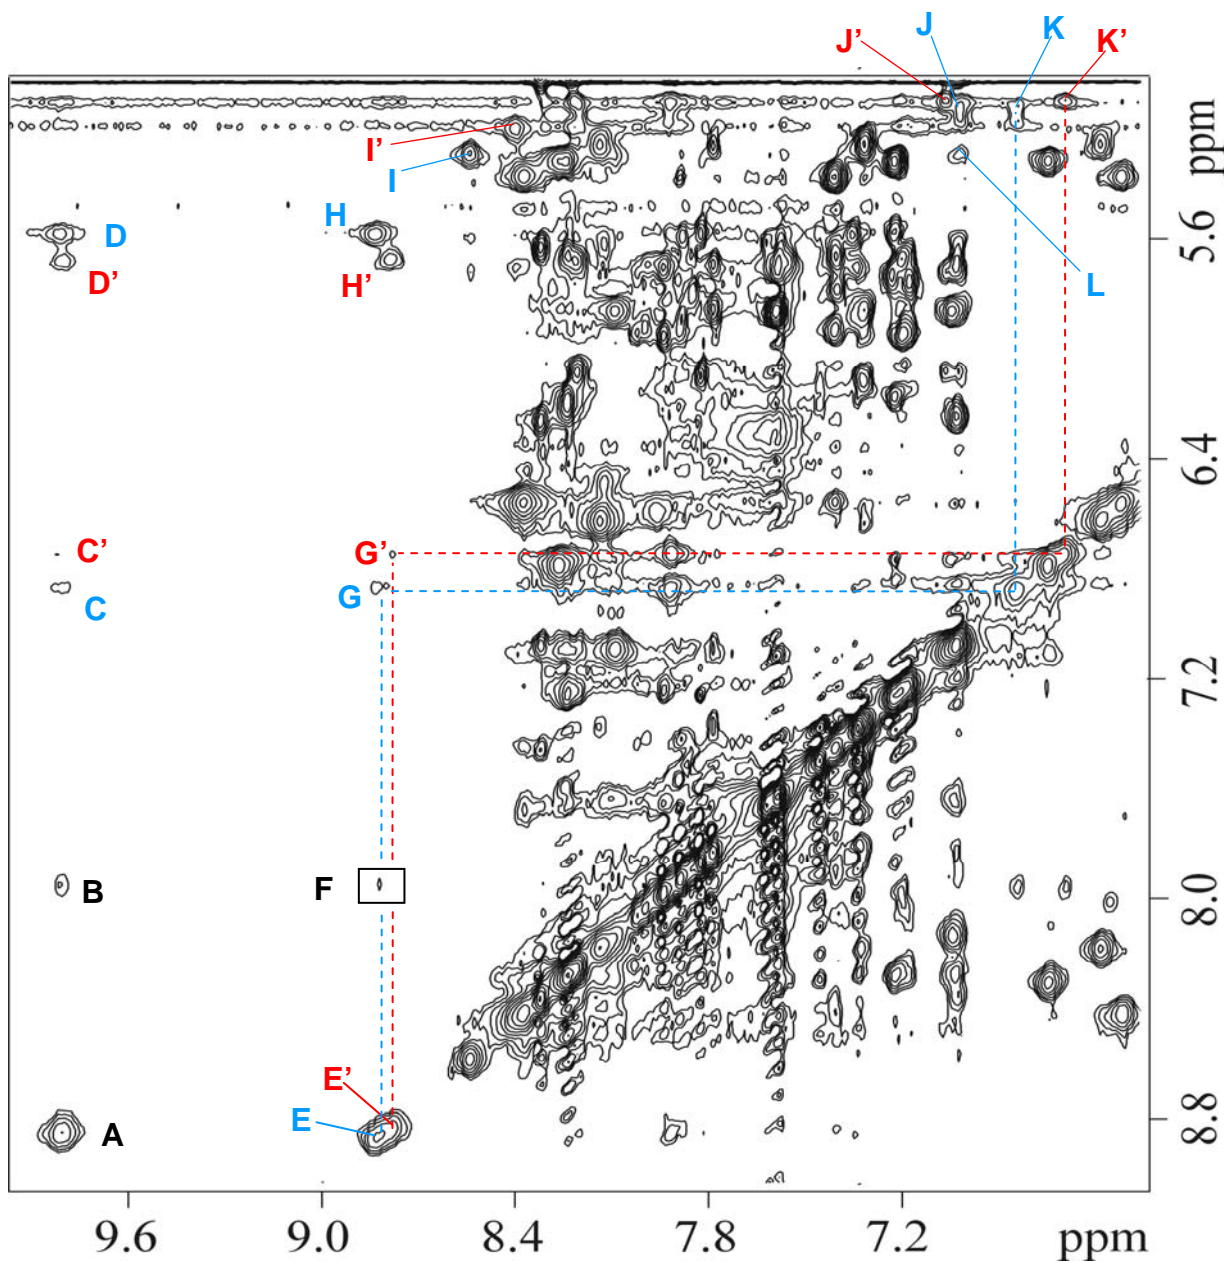

Figure 3S: Expanded region of a 220 ms mixing time NOESY recorded at 5°C with the sample dissolved in 10% D<sub>2</sub>O phosphate buffer, pH 5.9, depicting NOE interactions used for enantiomer specific assignment on the unmodified strand. Non-primed (blue) and primed (red) labels differentiate NOE interactions on the S and R isomers, respectively. Peaks are assigned as follow: A, C17(N4H)<sub>hb</sub>-C17(N4H)<sub>nhb</sub>; B, C17(N4H)<sub>hb</sub>-C5(N4H)<sub>hb</sub>; C, C17(N4H)<sub>hb</sub>-C5(N4H)<sub>nhb</sub>; D, C17(N4H)<sub>hb</sub>-C17(H5); E, C17(N4H)<sub>nhb</sub>; F, C17(N4H)<sub>nhb</sub>-C5(N4H)<sub>hb</sub>; G, C17(N4H)<sub>nhb</sub>-C5(N4H)<sub>nhb</sub>; H, C17(N4H)<sub>nhb</sub>-C17(H5); I, G6(N2H)-X6(H $\alpha$ ); J, C5(H6)-C5(H5); K, C5(N4H)<sub>nhb</sub>-C5(H5); L, C5(H6)-G6(H $\alpha$ ).

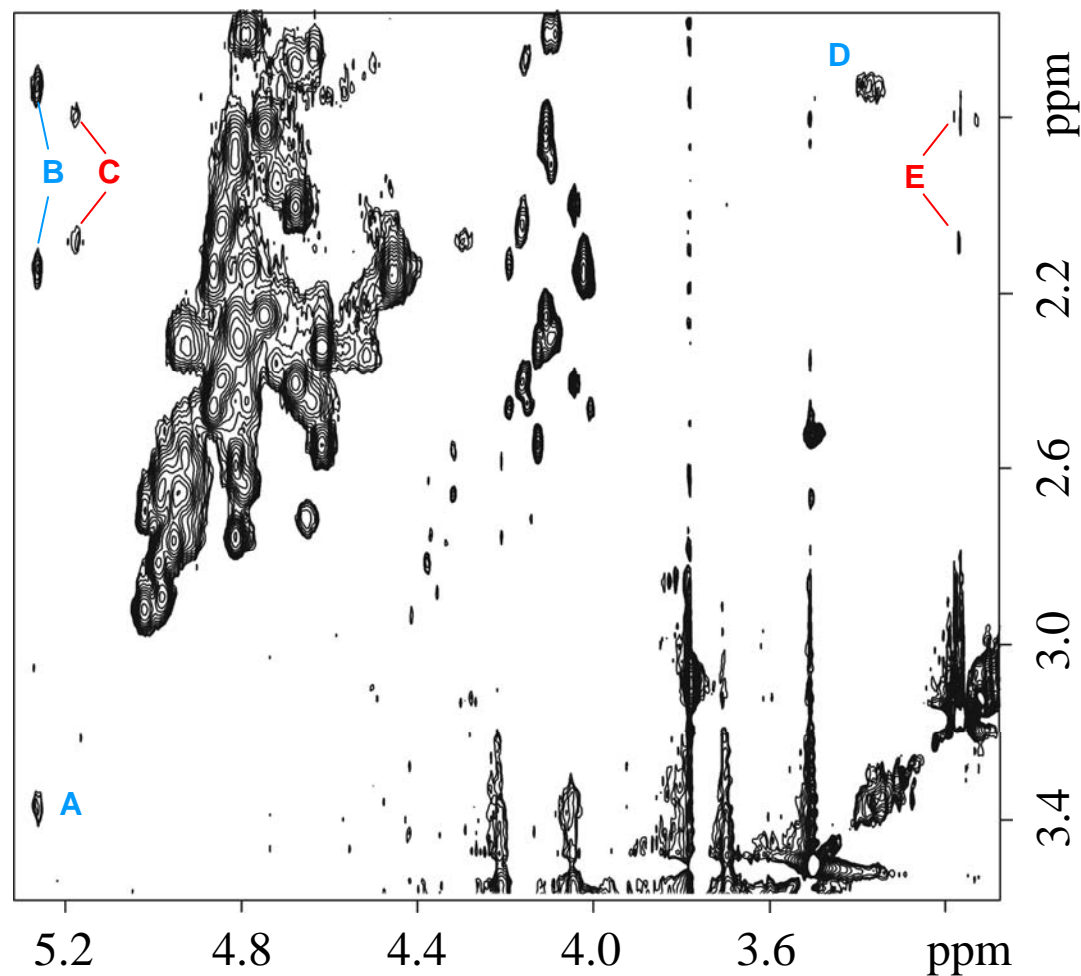

Figure 4S: Expanded region of a 120 ms isotropic mixing time TOCSY spectrum recorded at 25°C with the sample dissolved in 100% D<sub>2</sub>O phosphate buffer, pH 5.9. The figure displays interactions among protons of the exocyclic propano ring with blue and red colors indicating the S and R isomers, respectively. Labels are assigned as follow: A,  $\alpha$ -OH-PdG(H $\alpha$ )- $\alpha$ -OH-PdG(H $\gamma$ ); B,  $\alpha$ -OH-PdG(H $\alpha$ )- $\alpha$ -OH-PdG(H $\beta/\beta'$ ); C,  $\alpha$ -OH-PdG(H $\alpha$ )- $\alpha$ -OH-PdG(H $\beta/\beta'$ ); D,  $\alpha$ -OH-PdG(H $\gamma$ )- $\alpha$ -OH-PdG(H $\beta$ ); E,  $\alpha$ -OH-PdG(H $\gamma$ )- $\alpha$ -OH-PdG(H $\beta/\beta'$ ).

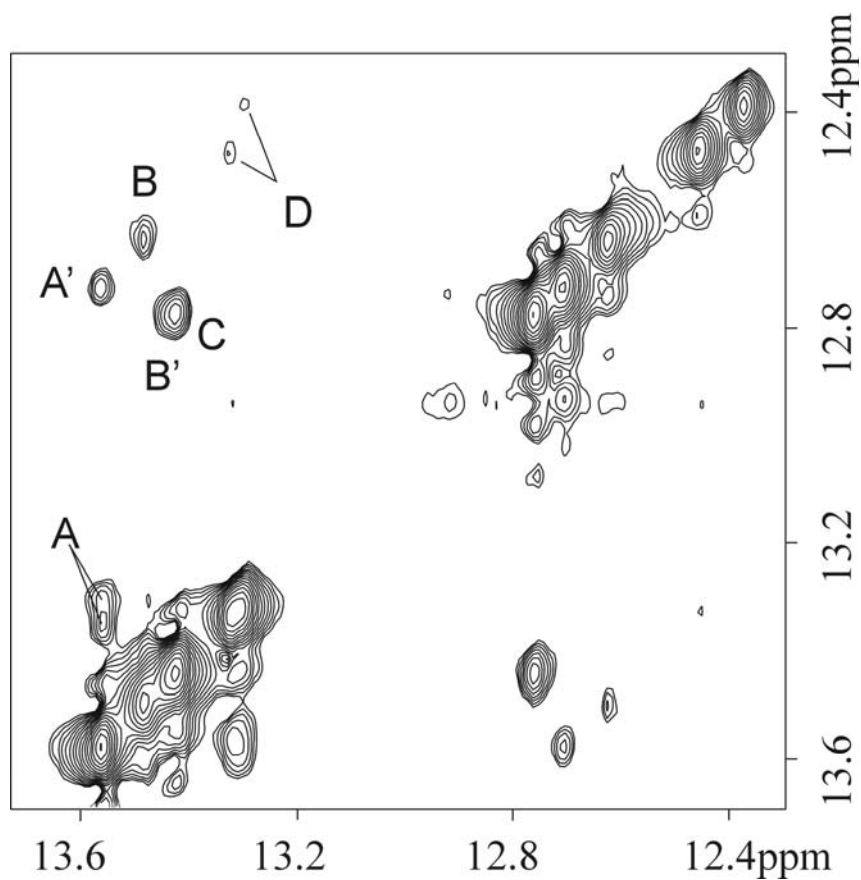

Figure 5S: Expanded region of a NOESY (220 ms mixing time) spectrum recorded at 5°C with the sample dissolved in 10% D<sub>2</sub>O phosphate buffer pH 5.9 (10 mM phosphate, 50 mM NaCl and 1 mM EDTA). Labeled peaks are assigned as follows: A, T9(N3H)-T15(N3H); A', T9(N3H)-G10(N1H); B, (S) T19(N3H)-G18(N1H); B', (R) T19r(N3H)-G18r(N1H); C, T3(N3H)-G2(N1H); D, T15(N3H)-G16(N1H).

## $\alpha$ -OH-PdG•dC<sup>+</sup> Duplexes

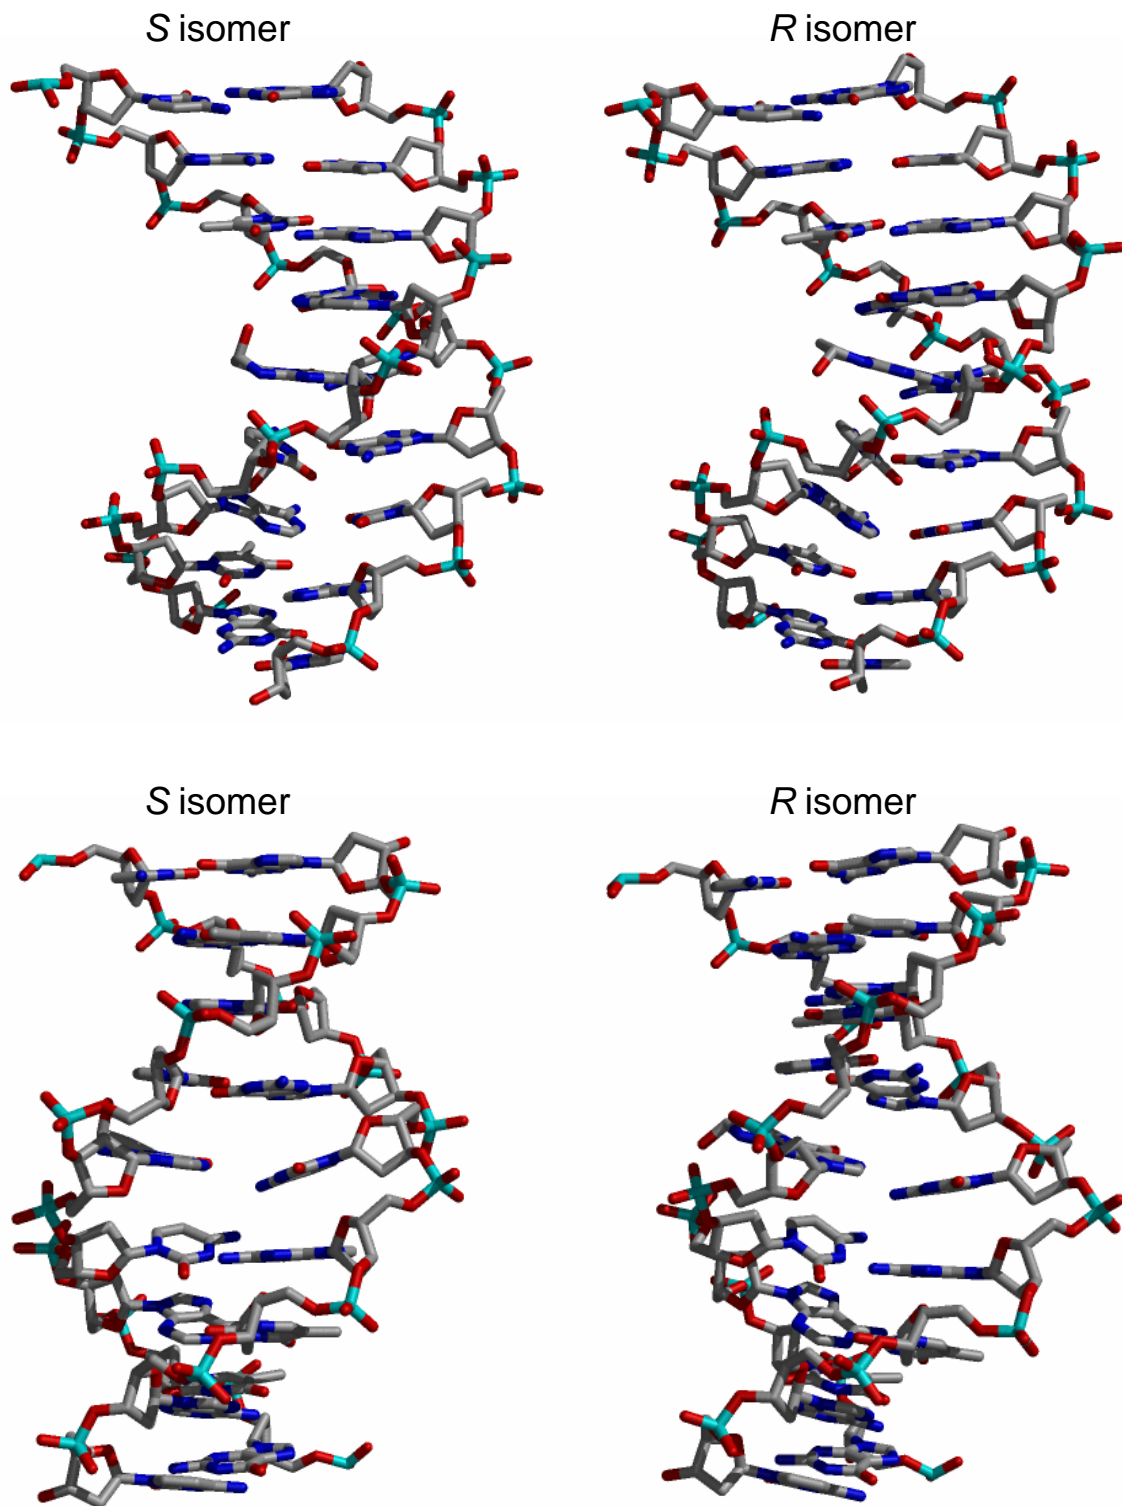

Figure 6S: Three-dimensional structure of  $\alpha$ -OH-PdG•dC<sup>+</sup> duplexes seen with the sugar-phosphate backbone (top) or the minor groove (bottom) prominent.
